# Supplementary material for: Pathogen corruption and site-directed recombination at a plant disease resistance gene cluster
Source: HighWire-hosted journal article supplement (doi:10.1101/gr.078766.108), 2008-08-21
Supplement: Suppl_FigS1.pdf [file Suppl_FigS1.pdf]

**Supplemental Figure 1.** Protein alignment of the NBS-LRR paralogues A, B and C of the *Pc* gene family from the cultivar *Pc/Pc* Colby. The region deleted in mutant M12 is inside the two opposing arrows. The region with a high unequal recombination rate (bp 3062-3622 on the consensus nucleotide sequence) is marked with asterisks (\*).

Colby\_B 1 -----MEALASGVLKAAGDKLVSLATEFAAIVGKRDLC  
Colby\_A 1 MAASAGPGGGVACNSQIFCRPLIYSRVENYYWNI SAATFPKKGLGNSFFDIMSGMEALASGVLKAAGDKLVSLATEFAAIVGKRDLC  
Colby\_C 1 -----MEALASGVLKAAGDKLVSLATEFAAIVGKRDLC

Colby\_B 37 QLQDIHADITGWL SACHDRAIQSETQSHWVVKLKDVA YDIDDILQEVQLEAEKQKMERDDDKSGIAGCFCAKPKSFAFRYKMAHK IKAIK  
Colby\_A 91 QLQDIHADITGWL SAAYDRAIQSETQSHWVVKLKDVA YDIDDILQEVQLEAEKQKMERDDDKSGIAGCFCAKPKSFAFRYKMAHK IKAIK  
Colby\_C 37 QLQDIHADITGWL SAAYDRAIQSETQSHWVVKLKDVA YDIDDILQEVQLEAEKQKMERDDDKSGIAGCFCAKPKSFAFRYKMAHK IKAIK

Colby\_B 127 VRFAAVVKQRSDFNTLVPTRDQHVGTR YKTVGEMTWL SKVPESKIPLRDQEKDEIISKLVECNAGENNMIVSIIIGLGGSGKTTLAKHICH  
Colby\_A 181 VRFAAVVKQRSDFNTLVPTRDQHVGAR YKTVGEMTWL SKVPESKIPLRDQEKDEIISKLVECNAGENNMIVSIIIGLGGSGKTTLAKHICH  
Colby\_C 127 VRFAAVVKQRSDFNTLVPTRDQHVGAR YKTVGEMTWL SKVPESKIPLRDQEKDEIISKLVECNAGENNMIVSIIIGLGGSGKTTLAKHICH

Colby\_B 217 DVKIKEHFHGGEIFWVHV SQEFDVQKLI GKL FETIVGDN SDRHPPQH MVQKISEKLSNKKFLLI LDDAWHEDHRDWEQFMVQLKCGAPETR  
Colby\_A 271 DVKIKEHFHGGEIFWVHV SQEFDVQKLI GKL FETIVGDN SDRHPPQH MVQKISEKLSNKKFLLI LDDAWHEDHRDWEQFMVQLKCGAPETR  
Colby\_C 217 DVKIKEHFHGGEIFWVHV SQEFDVQKLI GKL FETIVGDN SDRHPPQH MVQKISEKLSNKKFLLI LDDAWHEDHRDWEQFMVQLKCGAPETR

Colby\_B 307 IMLTTRDRKVAQAVESRYTFELAF LSESESWNLF LKGSGLAEQLSSDEVQV GKEIIKGC GGVP LAIQTLGAVLRD KKKQISTWRAIRENN  
Colby\_A 361 IVL TTRDRKVAQAVESRYTFELAF LSESESWNLF LKGSGLAEQLSSDEVQV GKEIIKGC GGVP LAIQTLGAVLRD KKKQISTWRAIRENN  
Colby\_C 307 IVL TTRDRKVAQAVESRYTFELAF LSESESWNLF LKGSGLAEQLSSDEVQV GKEIIKGC GGVP LAIQTLGAVLRD KKKQISTWRAIRENN

Colby\_B 397 LKWKVQSIKDRVFASL KLSYIHLADEL KQCFTFC SIFPKGYGIRKDR LIAQWIAHGF INAMNGEQPEDVGRDYLD SLVVKVRF LQEVYGSWN  
Colby\_A 451 LKWKVQSIKDRVFASL KLSYIHLADEL KQCFTFC SIFPKGYGIRKDR LIAQWIAHGF INAMNGEQPEDVGRDYLD SLVVKVRF LQEVYGSWN  
Colby\_C 397 LKWKVQSIKDRVFASL KLSYIHLADEL KQCFTFC SIFPKGYGIRKDR LIAQWIAHGF INAMNGEQPEDVGRDYLD SLVVKVRF LQEVYGSWN

Colby\_B 487 TDIYTMHDLI HDLTRQILKDEL VTCVP IHTTEEFTHRYR YLSLTSFTENVDKGV FDKVRALYISDSKTSFDTTVKSSCCMR SVVLDY AID  
Colby\_A 541 TDIYTMHDLI HDLTRQILKDEL VTCVP IHTTEEFTHRYR YLSLTSFTENVDKGV FDKVRALYISDSKTSFDTTVKSSCCMR SVVLDY AID  
Colby\_C 487 TDIYTMHDLI HDLTRQILKDEL VTCVP IHTTEEFTHRYR YLSLTSFTENVDKGV FDKVRALYISDSKTSFDTTVKSSCCMR SVVLDY AID

Colby\_B 577 TPFSLF ILKFEYLGYLE IHNVSCTTVPEAISR CNWQLSHFVNCKGFVTLPE SVGKLRKLR TLELRG IITDLESLES PQSIGDCYV LQSLQLY  
Colby\_A 631 TPFSLF ILKFEYLGYLE IHNVSCTTVPEAISR CNWQLSHFVNCKGFVTLPE SVGKLRKLR TLELRG IITDLESLES PQSIGDCYV LQSLQLY  
Colby\_C 577 TPFSLF ILKFEYLGYLE IHNVSCTTVPEAISR CNWQLSHFVNCKGFVTLPE SVGKLRKLR TLELRG IITDLESLES PQSIGDCYV LQSLQLY

Colby\_B 667 DC SMLREIPSS LGRIGSL CVL DIERCSSLQQLPSDI IGEFKNLRTIN FNGCTGLQDLPSTL SCPTLR TLNLSETKV TMLPQWVTSIDTLE  
Colby\_A 721 KCRKQREIPSS LGRIGNL CVL D-----FNGCTGLQDLPSTL SCPTLR TLNLSETKV TMLPQWVTSIDTLE  
Colby\_C 667 DC WKLREIPSS LGRIGNL CVL D-----FNGCTGLQDLPSTL SCPTLR TLNLSETKV TMLPQWVTSIDTLE

Colby\_B 757 CIDLKG CNELR ELPKGIANLKR LIAV LNI EHC SBL CCLPSGLQLTR LRKLG LFFVVGCGADDAR ISELENLDMIGGRLEITNL KYLKDPSD  
Colby\_A 786 CIDLKG CNELR ELPKGIANLKR LIAV LNI EHC SBL CCLPSGLQLTR LRKLG LFFVVGCGADDAR ISELENLDMIGGRLEITNL KYLKDPSD  
Colby\_C 732 CIDLKG CNELR ELPKGIANLKR LIAV LNI EHC SBL CCLPSGLQLTR LRKLG LFFVVGCGADDAR ISELENLDMIGGRLEITNL KYLKDPSD

Colby\_B 847 AEKACLKRKSNIQHLEL IWSLSDAE EELVSDMEHDWGV LNALEPPSQIESLDIYGYRG PCLPGWMMKQNDSSYCEGGIMLKQT VASHFLC  
Colby\_A 876 AEKACLKRKSNIQHLEL IWSLSDAE EELVSDMEHDWGV LNALEPPSQIESLDIYGYRG PCLPGWMMKQNDSSYCEGGIMLKQT VASHFLC  
Colby\_C 822 AEKACLKRKSNIQHLEL IWSLSDAE EELVSDMEHDWGV LNALEPPSQIESLDIYGYRG PCLPGWMMKQNDSSYCEGGIMLKQT VASHFLC

Colby\_B 937 LTL LSLVRF PNLRHMRGFVELPSLKTLE LAEMP NLEELWTTSSGFETGEKELAAQH LFPVLSSEIYGC PKLNVSPYFP PSLVHMSLNRI  
Colby\_A 966 LTL LSLVRF PNLRHMRGFVELPSLKTLE LAEMP NLEELWTTSSGFETGEKELAAQH LFPVLSSEIYGC PKLNVSPYFP PSLVHMSLNRI  
Colby\_C 912 LTL LSLVRF PNLRHMRGFVELPSLKTLE LAEMP NLEELWTTSSGFETGEKELAAQH LFPVLSSEIYGC PKLNVSPYFP PSLVHMSLNRI  
\*\*\*\*\*

Colby\_B 1027 NGQLLSTGRF SHQLPSMHAMV--LQSLV LSEVTGSSSGWELLQHL TELKELYIDTCNDLTQLPESMRNLT-----  
Colby\_A 1056 NGQLLSA GRF SHQLPSMHALVPR LKSLV LSEVTGSSSGWELLQHL TELKELYIYRCNDLTQLPESMRNLTSLERLR IDECPAVGTL PDWL  
Colby\_C 1002 NGQLLSTGRF SHQLPSMHALVPR LKSLV LSEVTGSSSGWELLQHL TELKELYIYRCNDLTQLPESMRNLTSLERLR IDECPAVGTL PDWL  
\*\*\*\*\*

Colby\_B 1095 -----SLEHLELSSG PALTVLPEWIGQLSALRS LYI QHSPALQYLPQSIQR LTALELLCIYGC PGLAE  
Colby\_A 1146 GELHSLRDLV LGMGDLKQFPEAI QHLT SLEHL D LSGPALTVLPEWIGQLSALRS LYI QHSPALQYLPQSIQR LTALELLCIYGC PGLAE  
Colby\_C 1092 GELHSLRDLV LGMGDLKQFPEAI QHLT SLEHLELSSG PALTVLPEWIGQLSALRS LYI QHSPALQYLPQSIQR LTALELLCIYGC PGLAE  
\*\*\*\*\*

Colby\_B 1158 RYKRGE GPDWHLVSHIPLVVIDFV VNTAN----ATVGT DAL--  
Colby\_A 1236 RYKRGE GPDWHLVSHIPLVVIDFV VNTAN----ATVGT DAL--  
Colby\_C 1182 RYKRGE GPDWHLVSHIPLVVIDFV VNTAN----ATVGT DAL--
