# Supplementary material for: Pathogen corruption and site-directed recombination at a plant disease resistance gene cluster
Source: HighWire-hosted journal article supplement (doi:10.1101/gr.078766.108), 2008-08-21
Supplement: Supplemental_Table_S1.pdf [file Supplemental_Table_S1.pdf]

**Supplemental Table S1.** Primers specific for the paralogues A, B and C, used to confirm the presence of recombinant paralogues in *Pc* mutants.

| Paralogue | Forward primers       | Reverse primers      |
|-----------|-----------------------|----------------------|
| A         | AGACCCTTGTGCTGGGGAAC  | CCCATTCCCAATACAAGGTC |
|           | GTTTAACTTGGTTAACGGTAA | GTGCAGGGCCTGATAACAGG |
| B         | AGCATGCACGCGATGGTTCT  | TGAAGGGCAGGGGAATGCTG |
|           | CAGACATCATTGGGGAGTTC  |                      |
| C         | TTGAGAGGTTGGAGATCTT   | ATATAAAGCCGACGAAGCGT |
|           | CATACAAAACCTGGAGCTGAA |                      |
